# Supplementary material
Source: PubMed Central journal article supplement (PMC3282393)
Supplement: hdy201169x2.pdf [file hdy201169x2.pdf]

Appendix S2. Proportion of phenotypic variance after having accounted for fixed effects ( $V_p$ ) explained by additive genetic ( $h^2$ ), year, year of birth, and permanent environmental effects in the Ram Mountain bighorn sheep population for adult horn volume ( $\text{cm}^3$ ), horn length (cm), horn base circumference (cm) and body mass (kg) based on the restricted QTL mapping dataset. Standard errors generated by ASReml are presented in parentheses. Number of individuals and observations included in each analysis as well as trait means (standard deviation in parentheses) prior and following data transformation (see methods) are also presented. Significance of ratios was assessed using likelihood ratio tests ( $*p < 0.05$ ,  $**p < 0.01$ ,  $***p < 0.001$ ).

| trait                 | ind. | obs. | trait mean (sd) | transformed data mean (sd) | $V_p$       | $h^2$          | year           | year of birth  | perm. env      |
|-----------------------|------|------|-----------------|----------------------------|-------------|----------------|----------------|----------------|----------------|
| <i>Male traits</i>    |      |      |                 |                            |             |                |                |                |                |
| Horn volume           | 86   | 863  | 1538 (1036)     | 3.34 (1.57)                | 0.83 (0.13) | 0.36 (0.20)*   | 0.11 (0.03)*** | 0.25 (0.11)**  | 0.16 (0.18)    |
| Horn length           | 86   | 866  | 52.33 (18.37)   | 7.47 (2.49)                | 0.84 (0.13) | 0.50 (0.21)*   | 0.14 (0.04)*** | 0.19 (0.10)**  | 0.07 (0.18)    |
| Horn base circ.       | 86   | 865  | 30.58 (6.77)    | 10.24 (3.96)               | 0.81 (0.12) | 0.42 (0.18)**  | 0.09 (0.03)*** | 0.25 (0.10)**  | 0.09 (0.15)    |
| Body mass             | 86   | 868  | 72.72 (16.6)    | 6.67 (1.29)                | 0.54 (0.07) | 0.38 (0.17)**  | 0.16 (0.05)*** | 0.06 (0.08)    | 0.23 (0.16)*   |
| <i>Female traits</i>  |      |      |                 |                            |             |                |                |                |                |
| Horn volume           | 154  | 3121 | 114.2 (31.53)   | 4.70 (1.34)                | 0.94 (0.10) | 0.34 (0.13)*** | 0.07 (0.02)*** | 0.16 (0.07)*** | 0.27 (0.11)**  |
| Horn length           | 154  | 3146 | 22.91 (4.15)    | 8.18 (1.65)                | 1.03 (0.12) | 0.32 (0.15)*   | 0.05 (0.02)*** | 0.17 (0.08)**  | 0.36 (0.14)**  |
| Horn base circ.       | 156  | 3356 | 13.61 (1.05)    | 14.96 (2.29)               | 0.90 (0.08) | 0.41 (0.10)*** | 0.10 (0.03)*** | 0.11 (0.05)*** | 0.13 (0.08)*   |
| Body mass             | 156  | 3741 | 61.01 (9.15)    | 8.54 (1.52)                | 0.51 (0.04) | 0.22 (0.09)**  | 0.16 (0.04)*** | 0.00 (0.00)    | 0.26 (0.08)*** |
| <i>Sexes combined</i> |      |      |                 |                            |             |                |                |                |                |
| Horn volume           | 240  | 3984 | -               | -                          | 0.89 (0.08) | 0.27 (0.09)*** | 0.06 (0.02)*** | 0.13 (0.05)*** | 0.37 (0.08)*** |
| Horn length           | 240  | 4012 | -               | -                          | 0.95 (0.09) | 0.29 (0.10)*** | 0.06 (0.02)*** | 0.13 (0.06)*** | 0.40 (0.09)*** |
| Horn base circ.       | 242  | 4221 | -               | -                          | 0.89 (0.07) | 0.29 (0.08)*** | 0.09 (0.02)*** | 0.11 (0.05)*** | 0.27 (0.07)*** |
| Body mass             | 242  | 4609 | -               | -                          | 0.56 (0.04) | 0.21 (0.07)*** | 0.15 (0.03)*** | 0.04 (0.03)    | 0.29 (0.06)*** |
