# Supplementary material
Source: PubMed Central journal article supplement (PMC3282393)
Supplement: hdy201169x4.pdf [file hdy201169x4.pdf]

Appendix S4. Additive genetic (co)variances and correlations for fitness-related traits in adult bighorn sheep from Ram Mountain based on the QTL mapping dataset. Variance components are on the diagonal while covariance components are below the diagonal and correlations are above the diagonal (shaded area). Standard errors generated by ASREML are presented in parentheses.

|                 | Horn volume | Horn length | Horn base circ. | Body mass   |
|-----------------|-------------|-------------|-----------------|-------------|
| Horn volume     | 0.24 (0.09) | 0.80 (0.08) | 0.86 (0.06)     | 0.68 (0.15) |
| Horn length     | 0.20 (0.09) | 0.27 (0.10) | 0.35 (0.20)     | 0.62 (0.17) |
| Horn base circ. | 0.20 (0.07) | 0.09 (0.07) | 0.26 (0.08)     | 0.48 (0.17) |
| Body mass       | 0.11 (0.05) | 0.11 (0.05) | 0.09 (0.04)     | 0.12 (0.04) |
