# Supplementary material
Source: PubMed Central journal article supplement (PMC3282393)
Supplement: hdy201169x5.pdf [file hdy201169x5.pdf]

Appendix S5. All genomic regions with LOD > 1.175 (nominal p-value < 0.01) for the presence of horn size and body mass QTL in the Ram Mountain bighorn sheep population and their estimated parameters ( $V_{QTL}$ , phenotypic variance explained by the QTL after having accounted for fixed effects;  $q^2$ , proportion of phenotypic variance explained by the QTL after having accounted for fixed effects;  $h^2$ , residual heritability after having fitted the QTL effect). Areas with LOD > 1.175 used to test for QTL co-localization between bighorn sheep and domestic sheep are also presented.

| trait                 | LOD  | chr. | pos. (cM) <sup>†</sup> | closest marker | 1-LOD drop (cM) | LOD > 1.175 (cM) | $V_{QTL}$   | $q^2$       | $h^2$       | domestic sheep QTL |
|-----------------------|------|------|------------------------|----------------|-----------------|------------------|-------------|-------------|-------------|--------------------|
| <i>Male trait</i>     |      |      |                        |                |                 |                  |             |             |             |                    |
| Horn volume           | 1.59 | 1    | 361                    | BMS2263        | 310 - 361       | 352 - 361        | 0.47 (0.09) | 0.56 (0.08) | 0.00 (0.00) |                    |
|                       | 1.66 | 10   | 0                      | OarSEJ10, 11   | 0 - 6           | 0 - 2            | 0.36 (0.11) | 0.39 (0.10) | 0.00 (0.00) | [1]                |
|                       | 1.37 | 23   | 28                     | AGLA269        | 4 - 44          | 26 - 34          | 0.47 (0.15) | 0.56 (0.13) | 0.00 (0.00) |                    |
| Horn length           | 1.91 | 1    | 361                    | BMS2263        | 346 - 361       | 352 - 361        | 0.50 (0.09) | 0.60 (0.08) | 0.00 (0.00) |                    |
|                       | 1.31 | 18   | 12                     | ILSTS52        | 0 - 28          | 8 - 14           | 0.42 (0.16) | 0.48 (0.15) | 0.11 (0.13) |                    |
|                       | 2.82 | 23   | 26                     | AGLA269        | 16 - 38         | 6 - 38           | 0.65 (0.12) | 0.73 (0.06) | 0.00 (0.00) |                    |
| Horn base circ.       | 1.45 | 10   | 0                      | OarSEJ10, 11   | 0 - 6           | 0 - 2            | 0.32 (0.12) | 0.37 (0.12) | 0.06 (0.16) | [1]                |
| Body mass             | 1.35 | 23   | 37                     | RT9            | 16 - 80         | 32 - 40          | 0.25 (0.09) | 0.45 (0.13) | 0.00 (0.00) | [2-4]              |
| <i>Female trait</i>   |      |      |                        |                |                 |                  |             |             |             |                    |
| Horn volume           | 1.74 | 18   | 12                     | ILSTS52        | 0 - 30          | 0 - 20           | 0.36 (0.11) | 0.38 (0.10) | 0.00 (0.00) |                    |
|                       | 1.33 | 18   | 108                    | CSAP28E        | 78 - 108        | 104 - 108        | 0.38 (0.12) | 0.41 (0.11) | 0.00 (0.00) |                    |
| Horn base circ.       | 1.30 | 5    | 55                     | TGLA303        | 26 - 84         | 48 - 62          | 0.40 (0.11) | 0.44 (0.09) | 0.00 (0.00) |                    |
|                       | 1.58 | 6    | 66                     | JMP36          | 52 - 80         | 60 - 72          | 0.40 (0.10) | 0.43 (0.08) | 0.00 (0.00) |                    |
|                       | 1.59 | 18   | 12                     | ILSTS52        | 0 - 40          | 0 - 20           | 0.26 (0.11) | 0.29 (0.12) | 0.12 (0.14) |                    |
| Body mass             | 1.42 | 19   | 49                     | MCM61A         | 0 - 72          | 42 - 56          | 0.38 (0.10) | 0.43 (0.09) | 0.00 (0.00) |                    |
|                       | 1.32 | 2    | 190                    | BM81124        | 166 - 296       | 180 - 198        | 0.11 (0.04) | 0.22 (0.07) | 0.00 (0.00) | [5-7]              |
|                       | 1.44 | 24   | 44                     | BP28           | 0 - 54          | 30 - 50          | 0.12 (0.04) | 0.24 (0.07) | 0.00 (0.00) | [8-9]              |
|                       | 2.15 | 26   | 40                     | JMP58          | 30 - 44         | 32 - 44          | 0.13 (0.04) | 0.26 (0.07) | 0.00 (0.00) | [10]               |
| <i>Sexes combined</i> |      |      |                        |                |                 |                  |             |             |             |                    |
| Horn volume           | 1.95 | 18   | 9                      | ILSTS52        | 0 - 48          | 0 - 44           | 0.30 (0.09) | 0.33 (0.08) | 0.00 (0.00) |                    |
|                       | 1.21 | 18   | 108                    | CSAP28E        | 90 - 108        | 108              | 0.26 (0.08) | 0.29 (0.08) | 0.00 (0.00) |                    |
| Horn length           | 1.29 | 22   | 50                     | MAF92          | 28 - 58         | 48 - 52          | 0.30 (0.09) | 0.31 (0.08) | 0.00 (0.00) |                    |
| Horn base circ.       | 2.35 | 18   | 1                      | SRCRSP5        | 0 - 30          | 0 - 34           | 0.30 (0.08) | 0.33 (0.07) | 0.00 (0.00) |                    |
|                       | 1.27 | 19   | 46                     | MCM61A         | 0 - 66          | 42 - 50          | 0.27 (0.07) | 0.31 (0.07) | 0.00 (0.00) |                    |
| Body mass             | 1.47 | 2    | 190                    | BM81124        | 156 - 242       | 172 - 198        | 0.12 (0.04) | 0.21 (0.06) | 0.00 (0.00) | [5-7]              |
|                       | 1.25 | 22   | 10                     | HEL11          | 0 - 32          | 6 - 14           | 0.13 (0.04) | 0.23 (0.06) | 0.00 (0.00) |                    |
|                       | 1.18 | X    | 124                    | MCM25          | 80 - 124        | 124              | 0.09 (0.04) | 0.15 (0.07) | 0.08 (0.08) |                    |

<sup>†</sup>Map distances are based on Haldane's mapping function (see appendix S1) and therefore not directly comparable to distances presented in Poissant et al. (2010) where Kosambi's mapping function was used. [1] Horn morphology, Johnston *et al.* (2010), [2] body weight, Margawati *et al.*, (2006), [3] carcass weight, no 95% CI, Margawati *et al.*, (2009), [4] growth rate, Raadsma *et al.*,

(2009), [5] muscle development, Laville *et al.* (2004), [6] carcass weight, no 95% CI, Margawati *et al.*, (2009), [7] weight, suggestive, Walling *et al.* (2004), [8] muscle mass, Campbell *et al.* (2003), [9] body weight and growth rate, Raadsma *et al.* (2009), [10] body weight and growth rate, Raadsma *et al.* (2009).
